# Supplementary material
Source: publisher site journal article supplement (https://www.dovepress.com/article/543091)
Supplement: Supplementary file 1 [file Appendix%201_1.docx]

**Appendix 1**

**Pubmed**

1 Obstructive Sleep Apnea[Title/Abstract]

2 ((((Artificial Intelligence[Title/Abstract]) OR (Machine Learning[Title/Abstract])) OR (Deep Learning[Title/Abstract])) OR (Computer Vision[Title/Abstract])) OR (Natural Language Processing[Title/Abstract])

3 ((("2020/04/01"[Date - Publication] : "2025/04/01"[Date - Publication])) AND ("english"[Language])) AND ("journal article"[Publication Type])

4 ((Obstructive Sleep Apnea[Title/Abstract]) AND (((((Artificial Intelligence[Title/Abstract]) OR (Machine Learning[Title/Abstract])) OR (Deep Learning[Title/Abstract])) OR (Computer Vision[Title/Abstract])) OR (Natural Language Processing[Title/Abstract]))) AND (((("2020/04/01"[Date - Publication] : "2025/04/01"[Date - Publication])) AND ("english"[Language])) AND ("journal article"[Publication Type]))

**Web of science**

1 "TS=(""Obstructive Sleep Apnea"") "

2 "((((TS=(""Artificial Intelligence"")) OR TS=(""Machine Learning"")) OR TS=(""Deep Learning"")) OR TS=(""Computer Vision"")) OR TS=(""Natural Language Processing"") "

3 "(LA=(English)) AND DT=(Article) Timespan: 2020-04-01 to 2025-04-01 "

4 "#1 AND #2 AND #3

**Scopus**

((( TITLE-ABS-KEY ( "Artificial Intelligence" ) OR TITLE-ABS-KEY ( "Machine Learning" ) OR TITLE-ABS-KEY ( "Deep Learning" ) OR TITLE-ABS-KEY ( "Computer Vision" ) OR TITLE-ABS-KEY ( "Natural Language Processing" ) )) AND (TITLE-ABS-KEY ( "Obstructive Sleep Apnea" )) AND PUBYEAR > 2019 AND PUBYEAR < 2026 AND ( LIMIT-TO ( LANGUAGE,"English" ) ) AND ( LIMIT-TO ( DOCTYPE,"ar" ) ) AND ( LIMIT-TO ( SRCTYPE,"j" ) ) AND ( LIMIT-TO ( PUBSTAGE,"final" ) ) )

**IEEE Xplore**

("Document Title":Obstructive Sleep Apnea) OR ("Abstract":Obstructive Sleep Apnea) Content Type: Journals, Search Latest Date: 04/01/2020-04/01/2025
